# Supplementary material for: Rational Design of Peptides Derived from Odorant-Binding Proteins for SARS-CoV-2-Related Volatile Organic Compounds Recognition
Source: MDPI journal article supplement (doi:10.3390/molecules27123917), 2022-06-18
Supplement: s1 [file s1]

*Article*

# **Rational Design of Peptides Derived from Odorant-Binding Proteins for SARS-CoV-2-Related Volatile Organic Compounds Recognition**

**Jin Wang <sup>\*</sup>, Kenji Sakai and Toshihiko Kiwa**

Faculty of Interdisciplinary Science and Engineering in Health Systems, Okayama University, 3-1-1, Tsushima-Naka, Kitaku, Okayama, 700-8530, Japan; wangjin@okayama-u.ac.jp (J.W.); sakai-k@okayama-u.ac.jp (K.S.); kiwa@okayama-u.ac.jp (T.K.)

<sup>\*</sup> Correspondence: wangjin@okayama-u.ac.jp; Tel.: +81-86-251-8129

Aaegobp39 sequence was obtained from <https://www.uniprot.org/uniprot/Q176B6>:

MYVVNLVLVLLSLEILSTSDAAMTMKQLKNSLEMMRKACAPKFNVEASLDELKAGRFAN  
EADKELKCYTMCIAQMAGTLTKKGELSLSKTTAQIEAMLPQEIKAAAKEALNACKDIQSG  
FKDPCEKVYFSAKCAA EYNPDVFFFP

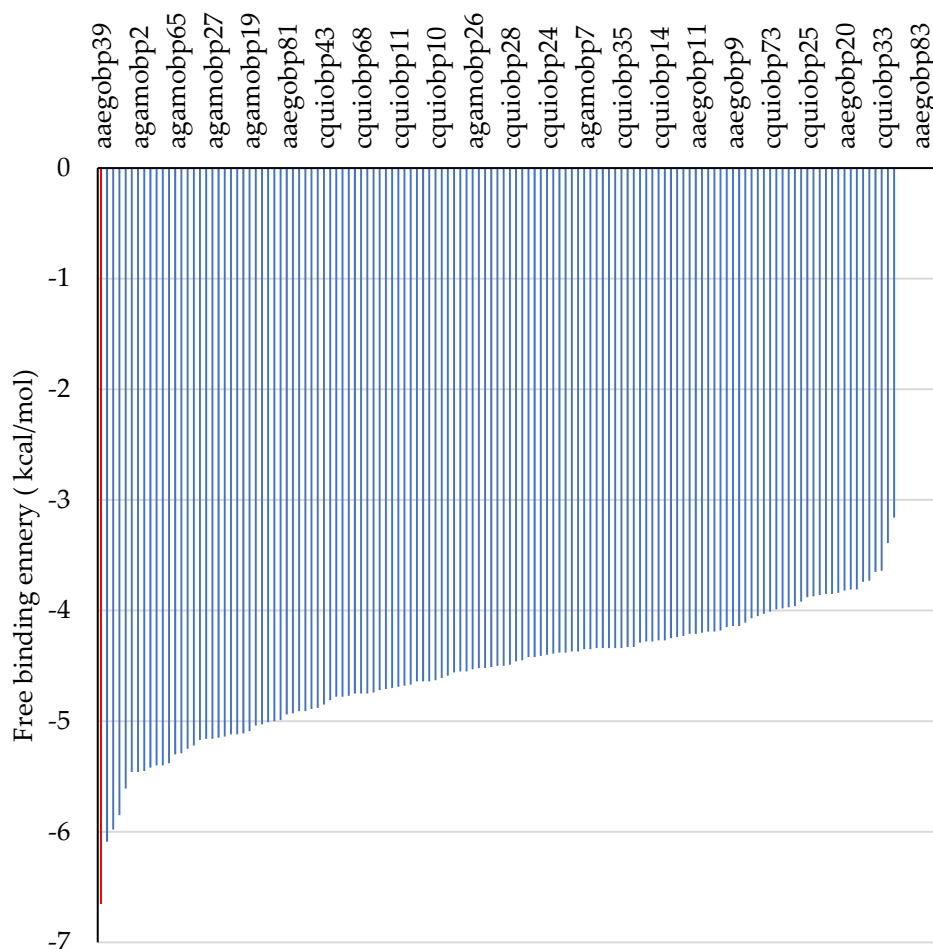

**Figure S1.** The free binding energy of mosquito classic and Plus-C OBPs corresponding to ligand nonanal (data was obtained from mOBP Database: <http://www.bo-protscience.fr/mobpdb/>)

**Table S1.** The prediction reports of binding pocket for ligand ethanol and the amino acids composition.

| name | lig_name  | volume | enclosure | surface | depth | surf/vol   | hydrophobic<br>interactions | hydrophobicity | Score    |
|------|-----------|--------|-----------|---------|-------|------------|-----------------------------|----------------|----------|
| P_0  | EOH_A_500 | 695.04 | 0.03      | 600.44  | 20.38 | 0.86389273 | 35                          | 0.49           | 0.840611 |
| P_1  | EOH_A_500 | 106.69 | 0.15      | 310.6   | 10.04 | 2.91123817 | 9                           | 0.25           | 0.278733 |

| name | ALA | ARG | ASN | ASP | CYS | GLN | GLU | GLY | HIS | ILE |
|------|-----|-----|-----|-----|-----|-----|-----|-----|-----|-----|
| P_0  | 4   | 1   | 1   | 0   | 0   | 0   | 1   | 1   | 2   | 1   |
| P_1  | 1   | 0   | 1   | 1   | 0   | 1   | 1   | 2   | 0   | 0   |

| name | LEU | LYS | MET | PHE | PRO | SER | THR | TRP | TYR | VAL |
|------|-----|-----|-----|-----|-----|-----|-----|-----|-----|-----|
| P_0  | 3   | 0   | 5   | 4   | 1   | 4   | 3   | 1   | 0   | 5   |
| P_1  | 0   | 1   | 0   | 2   | 0   | 1   | 0   | 0   | 0   | 1   |

**Table S2.** The prediction reports of binding pocket for ligand benzaldehyde and the amino acids composition.

| name | lig_name  | volume | enclosure | surface | depth | surf/vol   | hydrophobic interactions | hydrophobicity | Score    |
|------|-----------|--------|-----------|---------|-------|------------|--------------------------|----------------|----------|
| P_0  | HBX_A_200 | 552.38 | 0.1       | 540.53  | 20.28 | 0.97854738 | 18                       | 0.36           | 0.82617  |
| P_1  | HBX_A_200 | 182.21 | 0.21      | 324.39  | 8.06  | 1.78030844 | 17                       | 0.61           | 0.270989 |
| P_2  | HBX_A_200 | 182.08 | 0.09      | 407.51  | 11.39 | 2.23808216 | 16                       | 0.37           | 0.365149 |

| name | ALA | ARG | ASN | ASP | CYS | GLN | GLU | GLY | HIS | ILE |
|------|-----|-----|-----|-----|-----|-----|-----|-----|-----|-----|
| P_0  | 2   | 2   | 4   | 0   | 0   | 1   | 2   | 2   | 0   | 2   |
| P_1  | 0   | 0   | 1   | 2   | 0   | 0   | 1   | 0   | 1   | 0   |
| P_2  | 1   | 1   | 1   | 2   | 0   | 0   | 2   | 1   | 1   | 0   |

| name | LEU | LYS | MET | PHE | PRO | SER | THR | TRP | TYR | VAL |
|------|-----|-----|-----|-----|-----|-----|-----|-----|-----|-----|
| P_0  | 5   | 0   | 0   | 3   | 0   | 0   | 0   | 0   | 4   | 3   |
| P_1  | 1   | 1   | 1   | 1   | 0   | 0   | 0   | 1   | 1   | 0   |
| P_2  | 2   | 1   | 0   | 0   | 0   | 0   | 1   | 0   | 2   | 0   |

**Table S3.** The prediction reports of binding pocket for ligand acetone and the amino acids composition.

| name | lig_name | volume  | enclosure | surface | depth | surf/vol   | hydrophobic<br>interactions | hydrophobicity | Score    |
|------|----------|---------|-----------|---------|-------|------------|-----------------------------|----------------|----------|
| P_0  | Acetone  | 1485.44 | 0.13      | 1508.9  | 27.57 | 1.0157933  | 75                          | 0.4            | 0.814444 |
| P_1  |          | 279.23  | 0.15      | 418.17  | 11.09 | 1.49758264 | 21                          | 0.51           | 0.489561 |
| P_2  |          | 256.45  | 0.17      | 554.04  | 14.71 | 2.16042113 | 26                          | 0.49           | 0.599924 |

| name | ALA | ARG | ASN | ASP | CYS | GLN | GLU | GLY | HIS | ILE |
|------|-----|-----|-----|-----|-----|-----|-----|-----|-----|-----|
| P_0  | 5   | 1   | 2   | 0   | 6   | 3   | 4   | 6   | 3   | 5   |
| P_1  | 1   | 0   | 0   | 1   | 0   | 0   | 1   | 1   | 1   | 4   |
| P_2  | 2   | 0   | 2   | 0   | 2   | 0   | 1   | 1   | 1   | 0   |

| name | LEU | LYS | MET | PHE | PRO | SER | THR | TRP | TYR | VAL |
|------|-----|-----|-----|-----|-----|-----|-----|-----|-----|-----|
| P_0  | 6   | 2   | 4   | 4   | 7   | 0   | 3   | 0   | 2   | 4   |
| P_1  | 0   | 2   | 0   | 1   | 0   | 0   | 0   | 0   | 0   | 0   |
| P_2  | 1   | 1   | 1   | 3   | 1   | 1   | 1   | 0   | 0   | 1   |

**Table S4.** The prediction reports of binding pocket for ligand nonanal and the amino acids composition.

| name | lig_name | volume  | enclosure | surface | depth | surf/vol   | hydrophobic<br>interactions | hydrophobicity | Score    |
|------|----------|---------|-----------|---------|-------|------------|-----------------------------|----------------|----------|
| P_0  | Nonanal  | 1027.78 | 0.03      | 1033.37 | 23.61 | 1.00543891 | 61                          | 0.49           | 0.821954 |
| P_1  | Nonanal  | 242.69  | 0.14      | 453.37  | 14.27 | 1.86810334 | 21                          | 0.46           | 0.585585 |
| P_2  | Nonanal  | 112.06  | 0.26      | 318.06  | 6.11  | 2.83830091 | 15                          | 0.47           | 0.183907 |

| name | LEU | LYS | MET | PHE | PRO | SER | THR | GLY | HIS | ILE |
|------|-----|-----|-----|-----|-----|-----|-----|-----|-----|-----|
| P_0  | 6   | 2   | 5   | 3   | 1   | 3   | 3   | 0   | 0   | 4   |
| P_1  | 1   | 2   | 0   | 3   | 2   | 0   | 0   | 1   | 0   | 0   |
| P_2  | 1   | 1   | 0   | 1   | 1   | 0   | 0   | 0   | 0   | 0   |

| name | LEU | LYS | MET | PHE | PRO | SER | THR | TRP | TYR | VAL |
|------|-----|-----|-----|-----|-----|-----|-----|-----|-----|-----|
| P_0  | 6   | 2   | 5   | 3   | 1   | 3   | 3   | 0   | 2   | 2   |
| P_1  | 1   | 2   | 0   | 3   | 2   | 0   | 0   | 0   | 0   | 0   |
| P_2  | 1   | 1   | 0   | 1   | 1   | 0   | 0   | 0   | 0   | 2   |

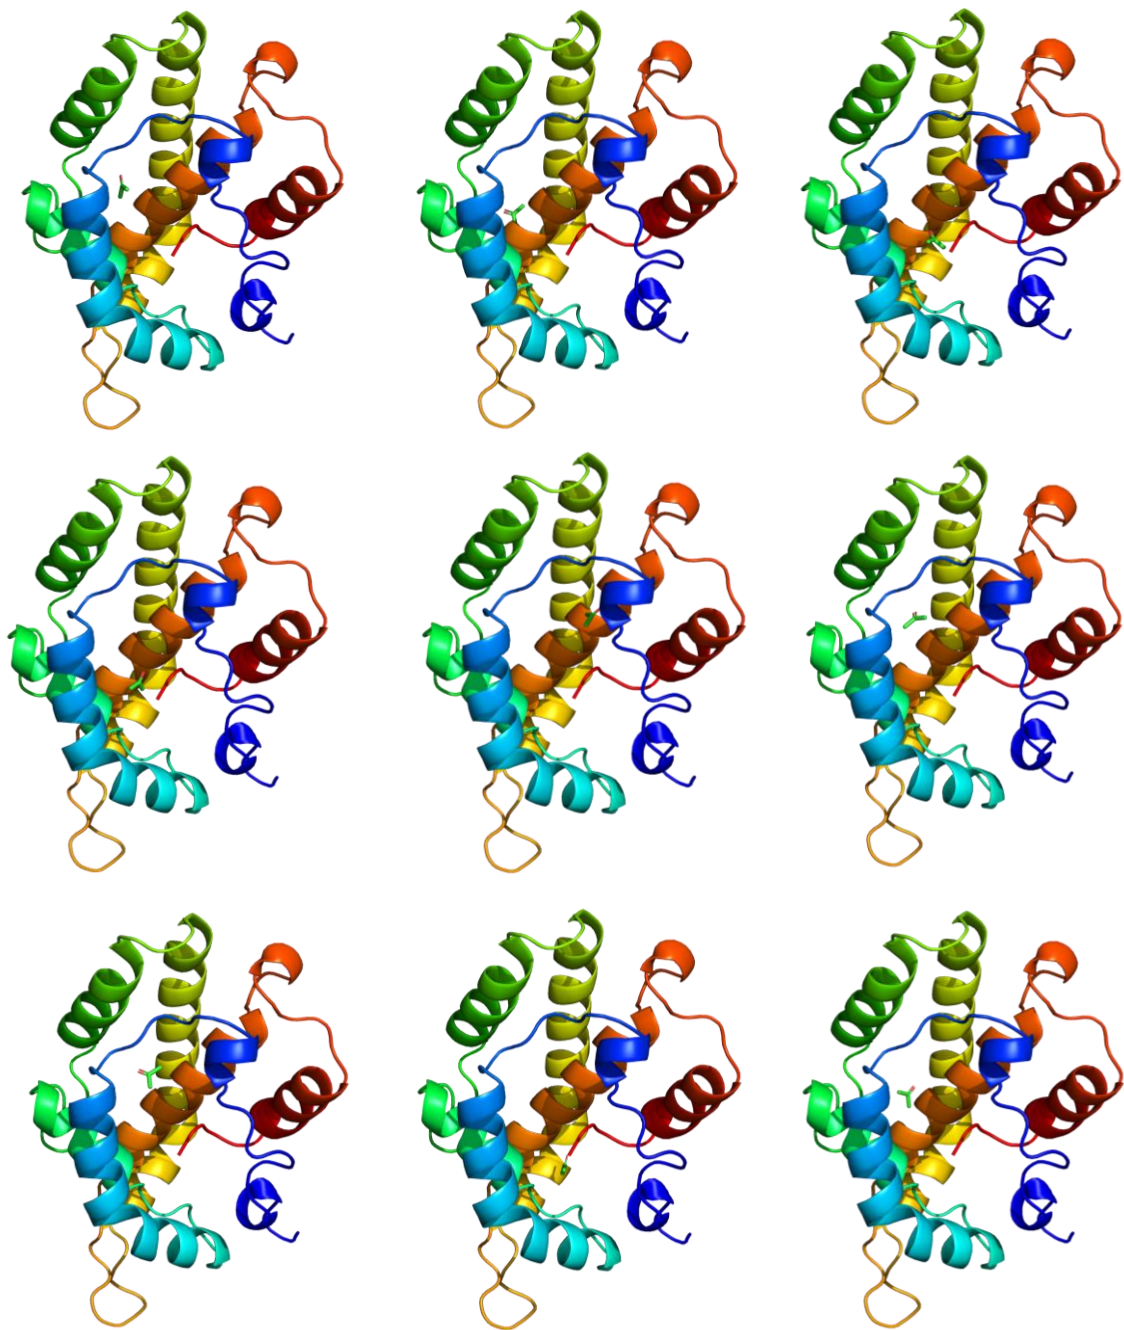

**Figure S2.** Nine docking modes of AgamOBP47 and ligand acetone complex.

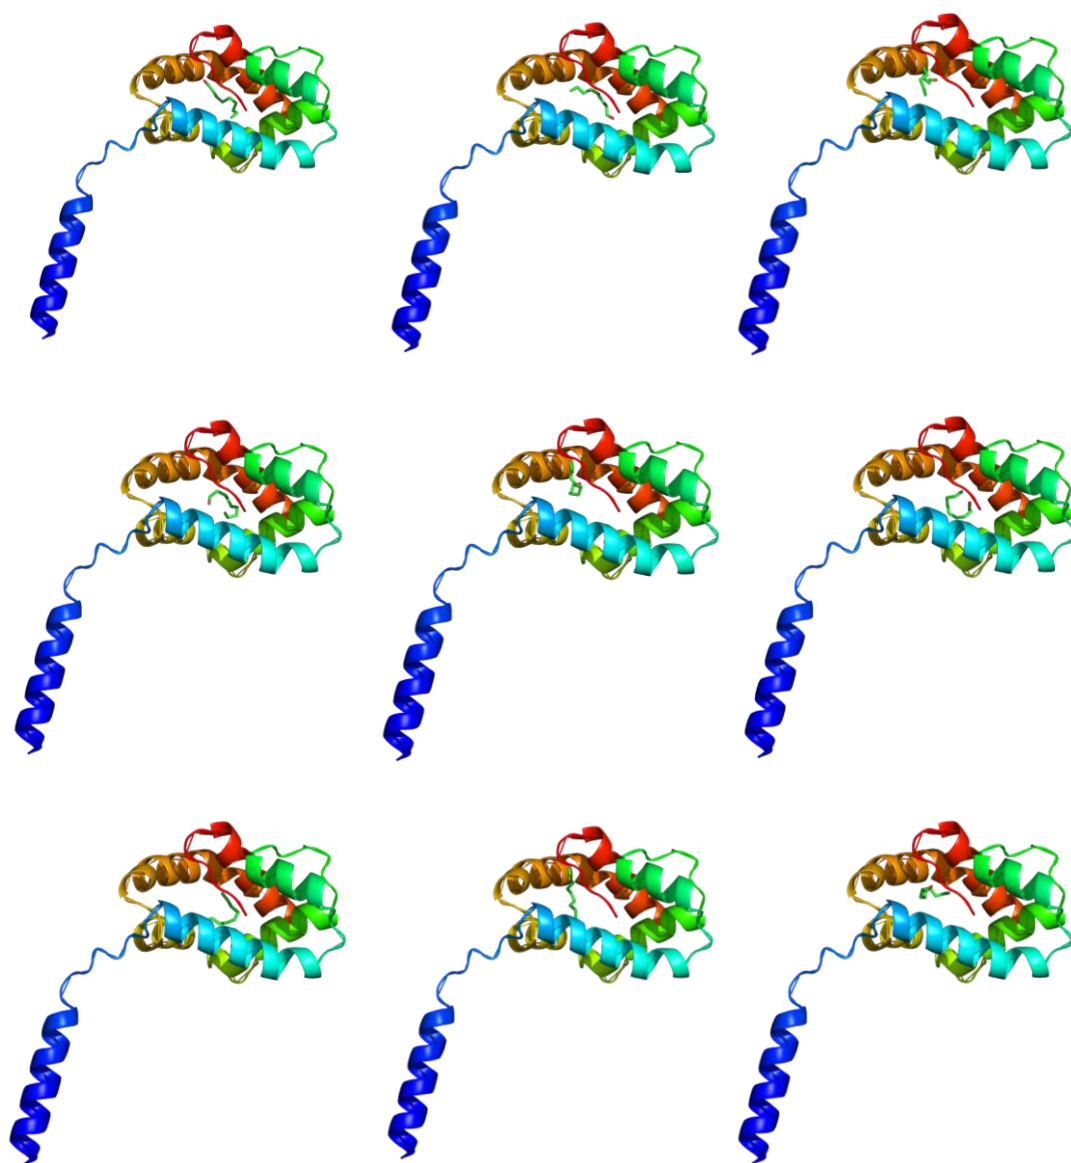

**Figure S3.** Nine docking modes of Aaegobp39 and ligand nonanal complex.



Table S5. PEPFOLD clustering reports (peptide sequence: TIAATLTILAALVSAANVFFF)

| Model          | sOPEP    | avg   | gdt   | max   | q     | tm    |
|----------------|----------|-------|-------|-------|-------|-------|
| PEPFOLD-model1 | -44.9829 | 0.769 | 0.89  | 0.825 | 0.718 | 0.645 |
| PEPFOLD-model2 | -44.7545 | 0.728 | 0.874 | 0.793 | 0.685 | 0.56  |
| PEPFOLD-model3 | -44.4068 | 0.767 | 0.887 | 0.816 | 0.716 | 0.649 |
| PEPFOLD-model4 | -43.1849 | 0.739 | 0.832 | 0.798 | 0.682 | 0.642 |
| PEPFOLD-model5 | -43.1494 | 0.794 | 0.919 | 0.878 | 0.777 | 0.602 |

Table S6. PEPFOLD clustering reports (peptide sequence: VRGLLYVNAYAFLY)

| Model          | sOPEP    | avg   | gdt   | max   | q     | tm    |
|----------------|----------|-------|-------|-------|-------|-------|
| PEPFOLD-model1 | -19.4774 | 0.728 | 0.865 | 0.803 | 0.685 | 0.561 |
| PEPFOLD-model2 | -19.464  | 0.649 | 0.766 | 0.643 | 0.613 | 0.573 |
| PEPFOLD-model3 | -19.3332 | 0.642 | 0.812 | 0.713 | 0.585 | 0.457 |
| PEPFOLD-model4 | -19.1929 | 0.643 | 0.775 | 0.646 | 0.611 | 0.539 |
| PEPFOLD-model5 | -18.9826 | 0.685 | 0.8   | 0.722 | 0.632 | 0.584 |

Table S7. PEPFOLD clustering reports (peptide sequence: TPFLVFVYVYLFL)

| Model          | sOPEP    | avg   | gdt   | max   | q     | tm    |
|----------------|----------|-------|-------|-------|-------|-------|
| PEPFOLD-model1 | -19.1114 | 0.442 | 0.629 | 0.489 | 0.375 | 0.275 |
| PEPFOLD-model2 | -18.3455 | 0.48  | 0.659 | 0.521 | 0.404 | 0.335 |
| PEPFOLD-model3 | -17.1037 | 0.487 | 0.675 | 0.56  | 0.42  | 0.295 |
| PEPFOLD-model4 | -15.848  | 0.541 | 0.698 | 0.62  | 0.493 | 0.353 |
| PEPFOLD-model5 | -15.5831 | 0.542 | 0.707 | 0.626 | 0.499 | 0.337 |

Table S8. The PEPFOLD clustering reports (peptide sequence: SATVFVTFW)

| Model          | sOPEP    | avg   | gdt   | max   | q     | tm    |
|----------------|----------|-------|-------|-------|-------|-------|
| PEPFOLD-model1 | -6.28941 | 0.645 | 0.817 | 0.728 | 0.597 | 0.439 |
| PEPFOLD-model2 | -6.26337 | 0.626 | 0.809 | 0.715 | 0.592 | 0.389 |
| PEPFOLD-model3 | -6.24768 | 0.631 | 0.829 | 0.738 | 0.572 | 0.386 |
| PEPFOLD-model4 | -5.46783 | 0.633 | 0.822 | 0.733 | 0.587 | 0.392 |
| PEPFOLD-model5 | -5.44114 | 0.673 | 0.841 | 0.792 | 0.662 | 0.399 |

sOPEP: the coarse grained energy of PEP-FOLD; gdt: the predicted GDT\_TS; q: the predicted Qmean score; tm: the predicted TMScore.

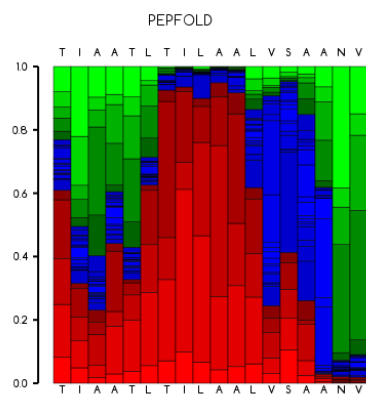

(a)

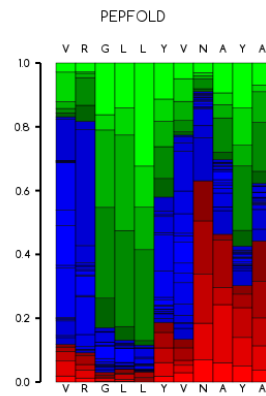

(b)

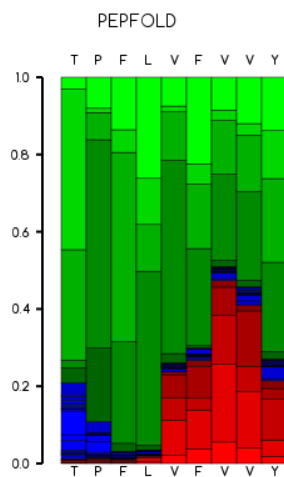

(c)

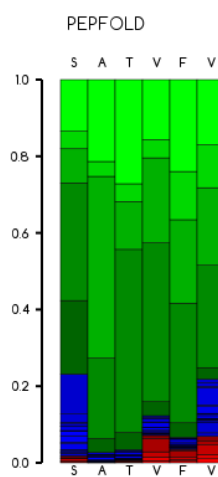

(d)

**Figure S4.** Local structure prediction profile for TIAATLTILAALVSAANVFFF(a); VRGLLYVNAYAFLY (b); TPFLVFVVYLFL (c); SATVFVTFW (d). (The profile is presented using the following color code: red: helical, green: extended, blue: coil)

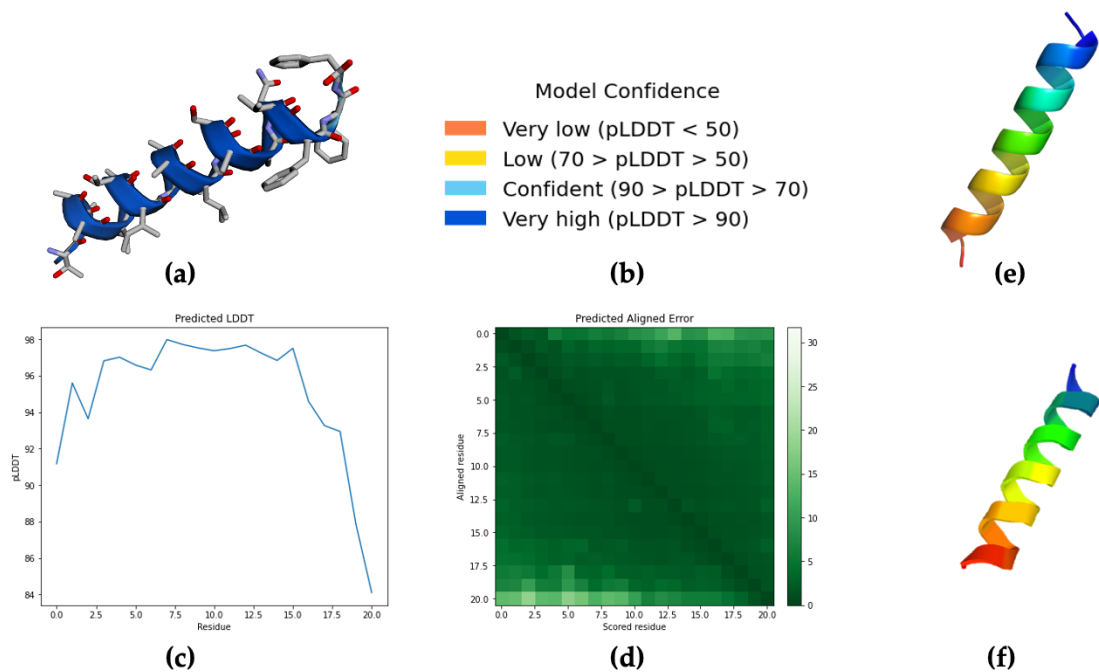

**Figure S5.** (a) Prediction results of nonanal binding peptide by AlphaFold Colab; (b) Model confidence; (c) In general the predicted local-distance difference test (pLDDT) for intra-domain confidence; (d) Predicted Aligned Error (PAE) for determining between domain or between chain confidence; (e) Peptide helix predicted by AlphaFold; (f) Peptide helix predicted by PEPFOLD3.
